# Supplementary material for: Visible light photocatalytic synthesis of H2O2 on synergistic phosphorus-doped and defect engineered graphite C3N4
Source: Royal Society of Chemistry journal article supplement (doi:10.1039/d4cy00455h), 2024-01-01
Supplement: d4cy00455h1.pdf [file d4cy00455h1.pdf]

## Supporting Information

### Visible light photocatalytic synthesis of H<sub>2</sub>O<sub>2</sub> on synergistic phosphorus-doped and defect engineered graphite C<sub>3</sub>N<sub>4</sub>

Xiankui Xu and Zhonghai Zhang\*

Shanghai Key Laboratory of Green Chemistry and Chemical Processes, School of Chemistry and Molecular Engineering, East China Normal University, Dongchuan Road 500, Shanghai 200241, China;  
52204300019@stu.ecnu.edu.cn, zhzhang@chem.ecnu.edu.cn.

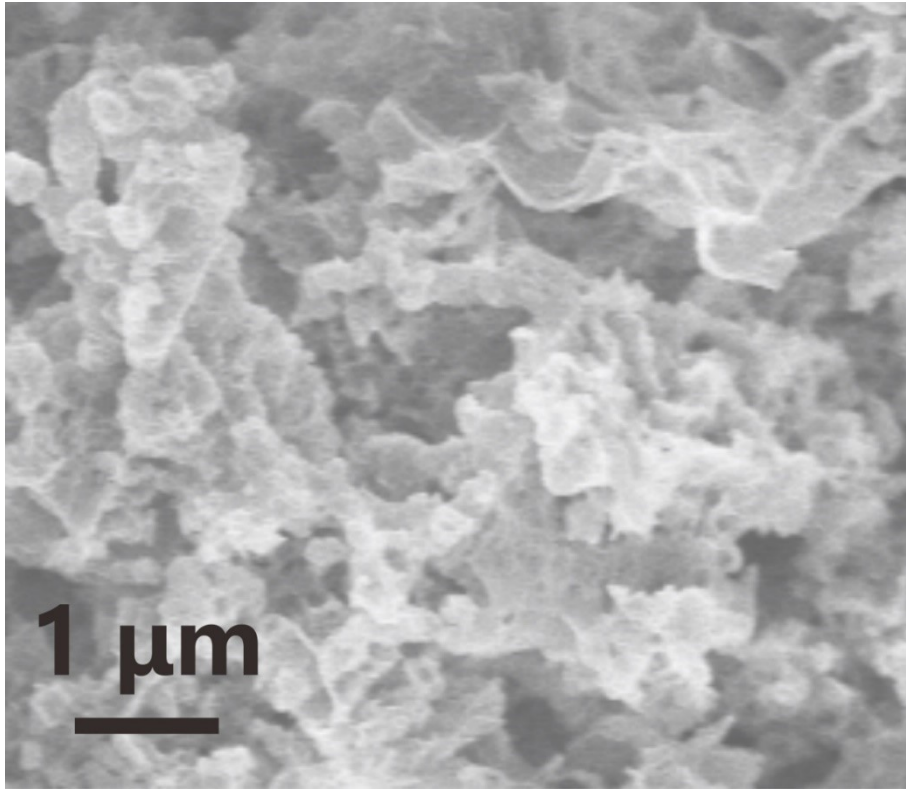

**Fig S1 SEM image of C<sub>3</sub>N<sub>4</sub>.**

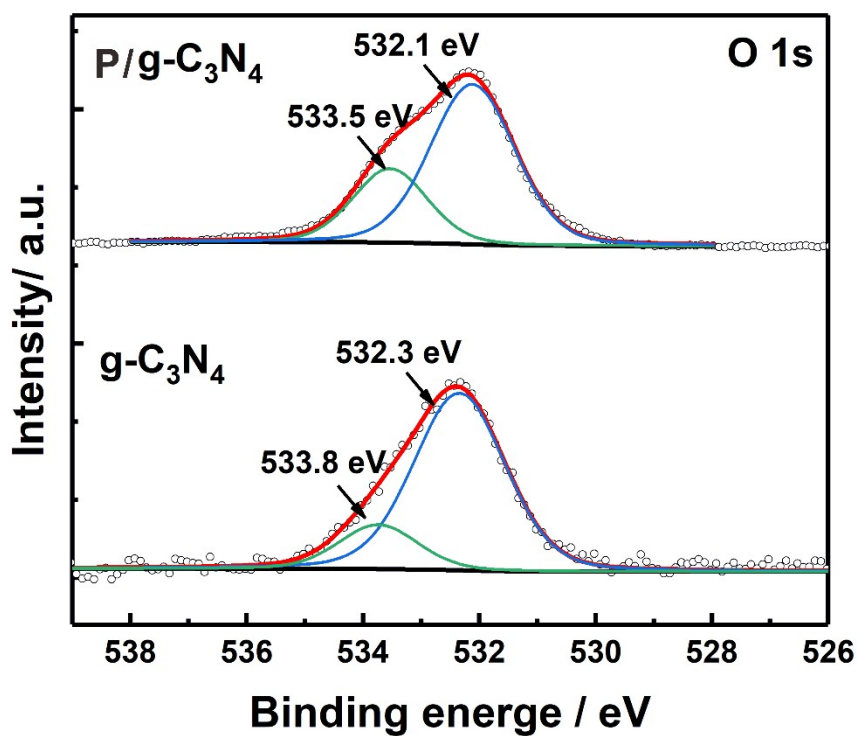

Fig S2 Core-level XPS of O 1s of  $g-C_3N_4$  and  $P-g-C_3N_4$ .

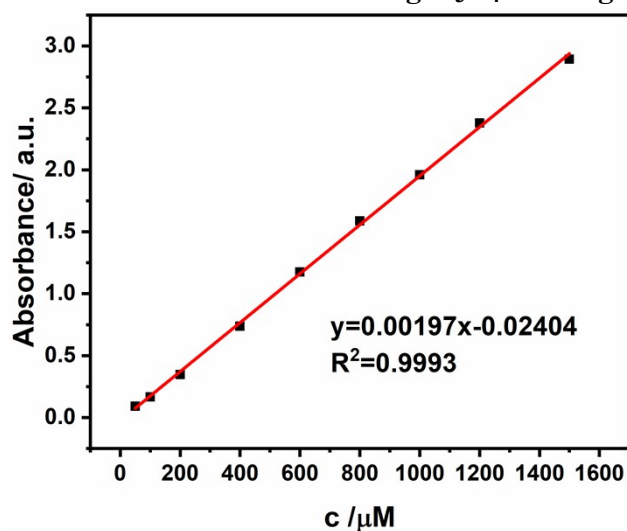

Fig S3 Standard curve of  $H_2O_2$  concentration.

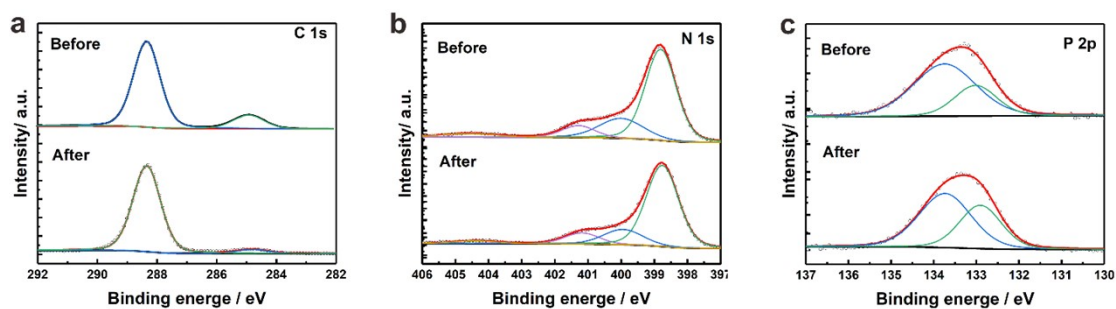

Fig S4 Core-level XPS of (a) C 1s, (b) N 1s, and (c) P 2p of  $P/g-C_3N_4$  before and after photocatalytic reactions.

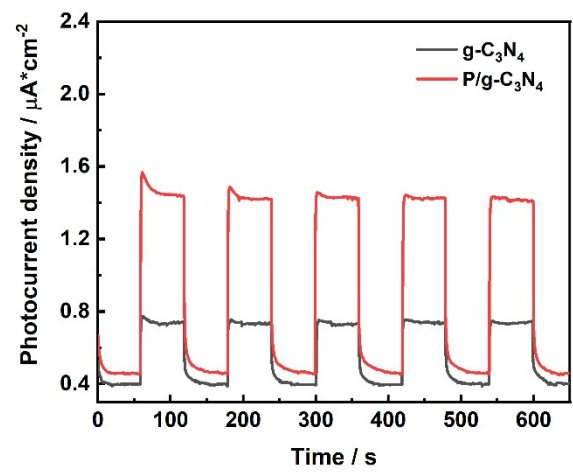

**Fig S5** Photocurrent density curves of  $\text{g-C}_3\text{N}_4$  and  $\text{P/g-C}_3\text{N}_4$ .

**Table S1 Performance comparison of different photocatalysts for H<sub>2</sub>O<sub>2</sub> production**

| Photocatalyst                                              | Electron donor | Light wavelength | H <sub>2</sub> O <sub>2</sub> /mM h <sup>-1</sup> | Ref. |
|------------------------------------------------------------|----------------|------------------|---------------------------------------------------|------|
| Cv-g-C <sub>3</sub> N <sub>4</sub>                         | /              | ≥420 nm          | 91.3                                              | [35] |
| IO Cv-g-C <sub>3</sub> N <sub>4</sub>                      | Ethanol        | ≥420 nm          | 162.9                                             | [36] |
| C <sub>3</sub> N <sub>4</sub> -carbon                      | 2-Propanol     | -                | 317.8                                             | [37] |
| Nv-g-C <sub>3</sub> N <sub>4</sub>                         | Ethanol        | > 400 nm         | 288.9                                             | [38] |
| Holey g-C <sub>3</sub> N <sub>4</sub>                      | 2-Propanol     | > 420 nm         | 80                                                | [39] |
| Reduced g-C <sub>3</sub> N <sub>4</sub>                    | /              | > 420 nm         | 170                                               | [40] |
| K, P, O doped g-C <sub>3</sub> N <sub>4</sub>              | Ethanol        | ≥420 nm          | 241.3                                             | [41] |
| KPF <sub>6</sub> -modified g-C <sub>3</sub> N <sub>4</sub> | Ethanol        | > 420 nm         | 312.5                                             | [42] |
| K, P co-doped g-C <sub>3</sub> N <sub>4</sub>              | Ethanol        | ≥420 nm          | 507                                               | [43] |
| g-C <sub>3</sub> N <sub>4</sub> /CNT                       | Formic acid    | ≥400 nm          | 487                                               | [44] |
| P-g-C <sub>3</sub> N <sub>4</sub>                          | Ethanol        | ≥420 nm          | 730.11                                            | This |
